# Supplementary material for: Anticancer Profile of Rhodanines: Structure–Activity Relationship (SAR) and Molecular Targets—A Review
Source: MDPI journal article supplement (doi:10.3390/molecules27123750), 2022-06-10
Supplement: s1 [file s1]

Supplemental materials for

# **Anticancer profile of rhodanines: structure-activity relationship (SAR) and molecular targets. A review**

**Jacek Szczepański, Helena Tuszevska and Nazar Trotsko \***

Chair and Department of Organic Chemistry, Faculty of Pharmacy, Medical University of  
Lublin, 4a Chodźki Street, 20-093 Lublin, Poland; jaacek.szczepanski.93@gmail.com  
(J.S.); tuszevska.helena93@gmail.com (H.T.); nazar.trotsko@umlub.pl (N.T.)

\* Correspondence: nazar.trotsko@umlub.pl (N.T.); Tel.: +48 81 448 7244

**Table S1.** The most potent 3-or 5-substituted, and 3,5-disubstituted rhodanine derivatives as anticancer agents

| Nr. | Structure                                                                           | Cell lines     | IC <sub>50</sub> ,<br>% inhibition | References |
|-----|-------------------------------------------------------------------------------------|----------------|------------------------------------|------------|
| 1   | 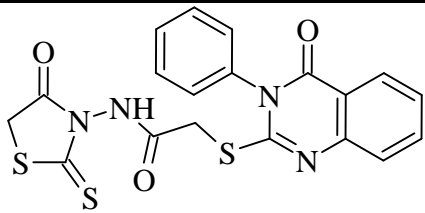   | MCF-7          | 64.4%                              | [25]       |
| 2   |    | K-562          | 14.6 µg/mL                         | [26]       |
| 3   |   | K-562,<br>HeLa | 11.1 µg/mL,<br>< 200 µg/mL         | [25,26]    |
| 4   |  | HCT 116        | 10 µM                              | [28]       |

|   |                                                                                    |                                  |                                       |      |
|---|------------------------------------------------------------------------------------|----------------------------------|---------------------------------------|------|
| 5 | 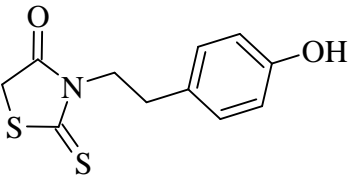  | MDA-MB231,<br>HCT 116,<br>Caco 2 | 2 $\mu$ M,<br>2 $\mu$ M,<br>3 $\mu$ M | [28] |
| 6 |   | A549                             | 43.6 $\mu$ M                          | [12] |
| 7 |   | CCRF-CEM/L                       | 56.34%                                | [29] |
| 8 |  | T-47D/BC                         | 76.91%                                | [29] |

|    |                                                                                    |                                  |                                                                 |      |
|----|------------------------------------------------------------------------------------|----------------------------------|-----------------------------------------------------------------|------|
| 9  | 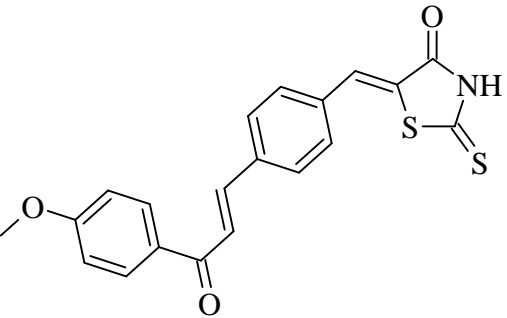  | HeLa,<br>HT29,<br>A549,<br>MCF-7 | 28.3 $\mu$ M,<br>24.5 $\mu$ M,<br>26.6 $\mu$ M,<br>28.6 $\mu$ M | [11] |
| 10 |   | HGC,<br>DU-145,<br>MCF-7         | 7.2 $\mu$ M,<br>15.3 $\mu$ M,<br>9.5 $\mu$ M                    | [30] |
| 11 |  | MCF-7                            | 7.67 $\mu$ g/mL                                                 | [34] |

|    |                                                                                    |                                       |                                                                                              |      |
|----|------------------------------------------------------------------------------------|---------------------------------------|----------------------------------------------------------------------------------------------|------|
| 12 | 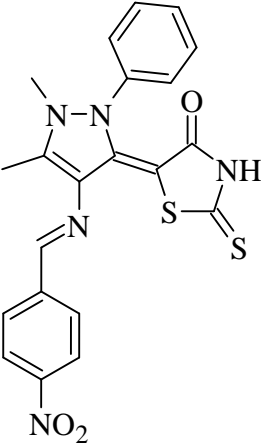  | MCF-7                                 | 11.7 $\mu\text{g/mL}$                                                                        | [34] |
| 13 |   | HL-60,<br>A549,<br>Raji,<br>MDA-MB201 | 2.66 $\mu\text{M}$ ,<br>5.31 $\mu\text{M}$ ,<br>4.48 $\mu\text{M}$ ,<br>6.42 $\mu\text{M}$   | [35] |
| 14 |  | HL-60,<br>A549,<br>Raji,<br>MDA-MB201 | 8.42 $\mu\text{M}$ ,<br>> 50 $\mu\text{M}$ ,<br>25.48 $\mu\text{M}$ ,<br>21.33 $\mu\text{M}$ | [35] |

|    |                                                                                     |                                                              |                                                                                                                                                                       |      |
|----|-------------------------------------------------------------------------------------|--------------------------------------------------------------|-----------------------------------------------------------------------------------------------------------------------------------------------------------------------|------|
| 15 | 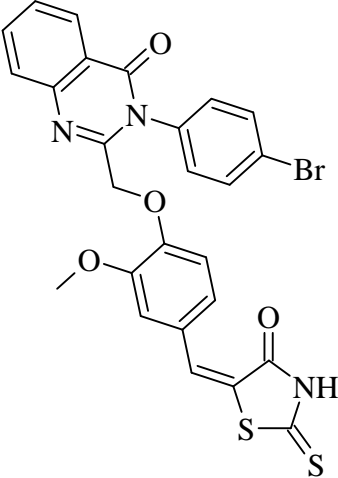   | HT-1080,<br>HL-60,<br>K-562,<br>AG01523                      | 8.7 $\mu\text{M}$ ,<br>1.2 $\mu\text{M}$ ,<br>1.5 $\mu\text{M}$ ,<br>> 100 $\mu\text{M}$                                                                              | [36] |
| 16 |   | CCRF-CEM,<br>RPMI-8226,<br>HOP-92,<br>Normal human cell line | GI <sub>50</sub> = 2.50 $\mu\text{M}$ ,<br>GI <sub>50</sub> = 2.52 $\mu\text{M}$ ,<br>GI <sub>50</sub> = 0.62 $\mu\text{M}$ ,<br>LC <sub>50</sub> > 100 $\mu\text{M}$ | [32] |
| 17 |  | HeLa S3,<br>Hep G2                                           | EC <sub>50</sub> = 7.9 $\mu\text{M}$ ,<br>EC <sub>50</sub> = 6.1 $\mu\text{M}$                                                                                        | [33] |

|    |                                                                                    |                |                               |      |
|----|------------------------------------------------------------------------------------|----------------|-------------------------------|------|
| 18 | 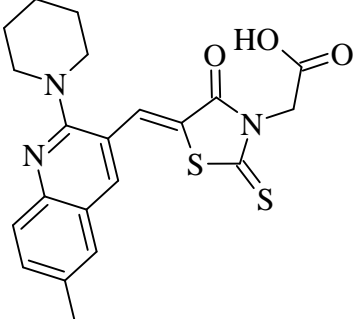  | HGC,<br>MNK-74 | 11.2 $\mu$ M,<br>13.9 $\mu$ M | [30] |
| 19 |   | MCF-7          | 81%                           | [36] |
| 20 |   | MCF-7          | 77%                           | [36] |
| 21 |  | MCF-7          | 71%                           | [36] |

|    |                                                                                     |                        |                               |      |
|----|-------------------------------------------------------------------------------------|------------------------|-------------------------------|------|
| 22 | 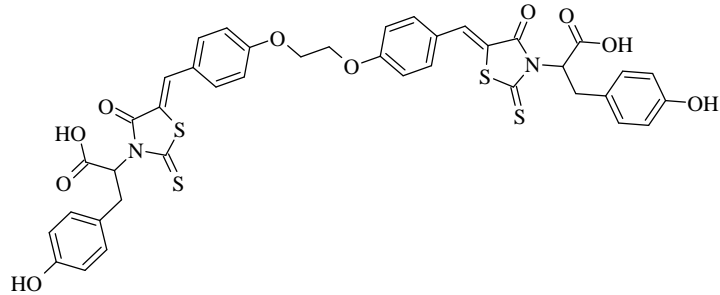   | A549                   | CTC <sub>50</sub> = 3.6 µg/mL | [37] |
| 23 |    | Huh7 D12,<br>Caco 2    | 8 µM,<br>8 µM                 | [13] |
| 24 |   | MCF-7                  | 82.5%                         | [25] |
| 25 |  | A549,<br>H460,<br>HT29 | 0.8 µM,<br>1.3 µM,<br>2.8 µM  | [12] |



|    |                                                                                   |                               |                                                                                                            |      |
|----|-----------------------------------------------------------------------------------|-------------------------------|------------------------------------------------------------------------------------------------------------|------|
| 26 | 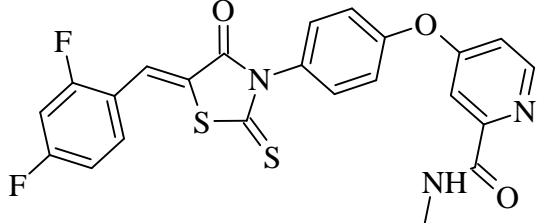 | A549,<br>H460,<br>HT29        | 3.1 $\mu$ M,<br>0.3 $\mu$ M,<br>2.8 $\mu$ M                                                                | [12] |
| 27 |  | Huh7,<br>MCF-7                | 4.67 $\mu$ M,<br>2.30 $\mu$ M                                                                              | [38] |
| 28 |  | MCF-7,<br>MDA-MB-231,<br>Huh7 | EC <sub>50</sub> = 1.732 $\mu$ M,<br>EC <sub>50</sub> = 2.912 $\mu$ M,<br>EC <sub>50</sub> = 3.797 $\mu$ M | [39] |

|    |                                                                                     |                                                             |                                                                 |      |
|----|-------------------------------------------------------------------------------------|-------------------------------------------------------------|-----------------------------------------------------------------|------|
| 29 | 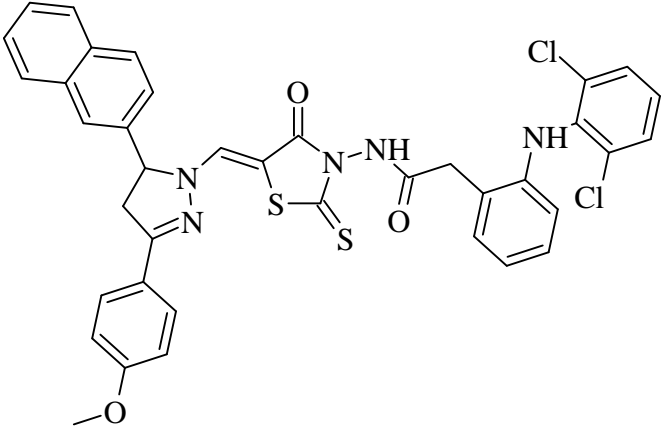   | panel of approximately sixty cancer cell lines <sup>1</sup> | GP mean= 22.40%                                                 | [10] |
| 30 |   | panel of approximately sixty cancer cell lines <sup>1</sup> | GP mean= 99.30%                                                 | [10] |
| 31 |  | HL-60,<br>MDA-MB-201,<br>Raji,<br>A549                      | 0.21 $\mu$ M,<br>0.33 $\mu$ M,<br>1.23 $\mu$ M,<br>2.67 $\mu$ M | [35] |

|    |                                                                                    |                                                         |                                                                 |      |
|----|------------------------------------------------------------------------------------|---------------------------------------------------------|-----------------------------------------------------------------|------|
| 32 | 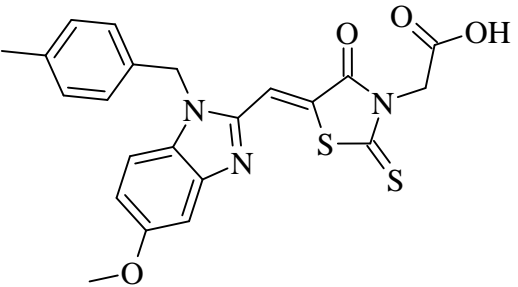  | HL-60,<br>MDA-MB-201,<br>Raji,<br>A549                  | 0.77 $\mu$ M,<br>1.22 $\mu$ M,<br>1.79 $\mu$ M,<br>5.68 $\mu$ M | [35] |
| 33 |   | HeLa                                                    | 52.00%                                                          | [27] |
| 34 |   | Huh7 D12,<br>HaCat,<br>MDA-MB231,<br>normal fibroblasts | 9 $\mu$ M,<br>8 $\mu$ M,<br>9 $\mu$ M,<br>> 25 $\mu$ M          | [40] |
| 35 |  | Dami                                                    | 35.10%                                                          | [41] |

|    |                                                                                     |                                         |                                                     |      |
|----|-------------------------------------------------------------------------------------|-----------------------------------------|-----------------------------------------------------|------|
| 36 | 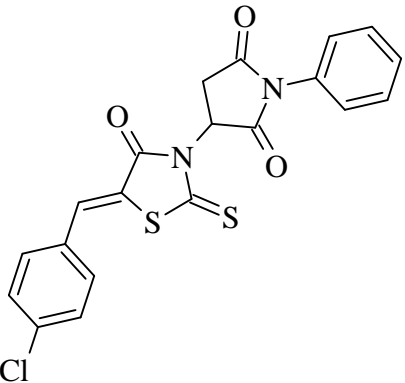   | Dami,<br>HL-60                          | 44.75%,<br>40.30%                                   | [41] |
| 37 |    | A2780,<br>A2780cisR                     | 4.4 nM,<br>3.3 nM                                   | [42] |
| 38 |   | K562,<br>K562                           | 8.79 µg/mL - T.B. assay,<br>19.62 µg/mL - MTT assay | [43] |
| 39 |  | 60 tumor cell lines MG_MID <sup>2</sup> | GI <sub>50</sub> = 1.57 µM                          | [44] |

|    |                                                                                     |                                         |                            |      |
|----|-------------------------------------------------------------------------------------|-----------------------------------------|----------------------------|------|
| 40 | 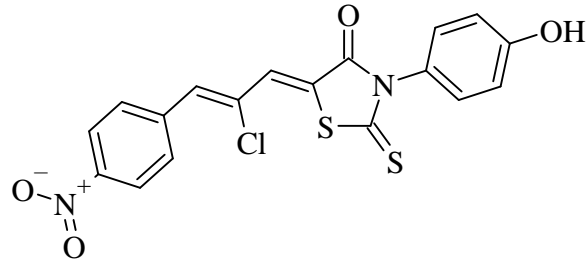   | 60 tumor cell lines MG_MID <sup>2</sup> | GI <sub>50</sub> = 2.8 μM  | [44] |
| 41 |    | 60 tumor cell lines MG_MID <sup>2</sup> | GI <sub>50</sub> = 4.79 μM | [44] |
| 42 |    | 60 tumor cell lines MG_MID              | GI <sub>50</sub> = 18 μM   | [44] |
| 43 |  | A549,<br>NRK-52E                        | 7 μM,<br>14.7 μM           | [46] |

|    |                                                                                   |           |        |      |
|----|-----------------------------------------------------------------------------------|-----------|--------|------|
| 44 | 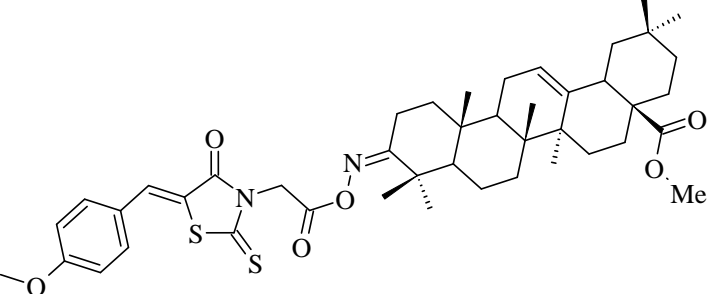 | BT-549/BC | 67.36% | [29] |
| 45 |  | IGROV1/OC | 82.21% | [29] |

MG\_MID - mean graph midpoint, arithmetical mean value for all tested cell lines.

<sup>1,2</sup> panel of approximately sixty cancer cell lines and 60 tumor cell lines MG\_MID the next cell lines were used: leukemia (CCRF-CEM, HL-60, K562, MOLT-4, RPMI-8226, SR), NSC lung cancer (A549, EKVX, HOP-62, HOP-92, NCI-H266, NCI-H23, NCI-H322M, NCI-H460, NCI-H522), colon cancer (COLO 205, HCT 116, HCT-15, HT29, KM12, SW-620, HCC-2998), CNS cancer (SF-268, SF-295, SF-539, SNB-19, SNB-75, U251), melanoma (LOX IMVI, MALME-3M, M14, MDA-MB-435, UACC-62, UACC-257, SK-MEL-2, SK-MEL-5, SK-MEL-28), ovarian cancer (IGROVI, OVCAR-3, OVCAR-4, OVCAR-5, OVCAR-8, NCI/ADR-RES, SK-OV-3), renal cancer (786-0, A498, ACHN, CAKI-1, RXF 393, SN12C, TK-10, UO-31), prostate cancer (PC-3, DU-145), breast cancer (MCF-7, MDA-MB-231, HS 578T, BT-549, T-47D, MDA-MB-468).
